# Supplementary material
Source: Springer Nature journal article supplement (https://www.springermedizin.de/resource/supplementary/12947_2008_238_MOESM4_ESM.pdf/9556524)

E velocity (cm/s)

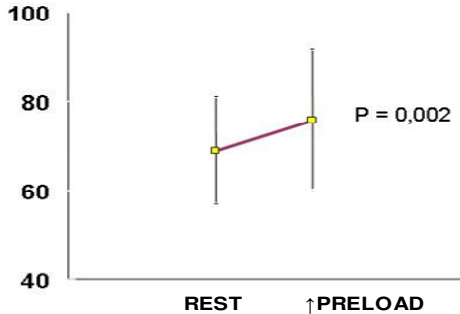

E' velocity (cm/s)

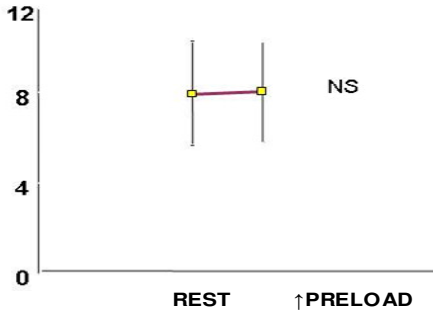

Supplement: MOESM4 [file 9556524]
